# Supplementary material
Source: publisher site journal article supplement (https://www.dovepress.com/article/488911)
Supplement: Supplementary file 1 [file get_supplementary_file.php]

# Supplementary Material

|  |
| --- |

**Table S1** Self-comparison of scale scores in both groups before and after COVID-19

| **Characteristic** | **SP group (n = 55)** | **P-value** | **NSP group (n = 33)** | **P-value** |
| --- | --- | --- | --- | --- |
| **PSQI (pre- vs. post-)** | 4.13 (1.78)/11.09 (2.56) | < 0.001a | 3.48 (1.73)/5.24 (1.54) | < 0.001a |
| Sleep quality | 0.8 (2.05)/2.05 (0.56) | < 0.001a | 0.67 (0.54)/1.18 (0.58) | < 0.001a |
| Sleep duration | 0.95 (0.65)/2.36 (0.65) | < 0.001a | 0.58 (0.61)/0.91 (0.77) | 0.006a |
| Sleep latency | 0.58 (0.50)/1.62 (0.71) | < 0.001a | 0.61 (0.61)/0.55 (0.71) | 0.677a |
| Habitual sleep efficiency | 0.24 (0.47)/0.95 (1.145) | < 0.001a | 0.12 (0.42)/0.24 (0.75) | 0.441a |
| Sleep disturbances | 0.76 (0.43)/1.24 (0.43) | < 0.001a | 0.70 (0.47)/1.00 (0.43) | 0.006a |
| Use of sleeping medication | 0.02 (0.14)/0.42 (0.92) | 0.002a | 0/0 | - |
| Daytime dysfunction | 0.78 (0.66)/2.42 (0.66) | < 0.001a | 0.82 (0.77)/1.36 (1.03) | 0.007a |
| **GAD (pre- vs. post-)** | 2.16 (2.00)/5.22 (4.10) | < 0.001a | 1.85 (2.02)/3.00 (3.01) | 0.100a |
| **PHQ (pre- vs. post-)** | 0.40 (2.51)/8.55 (4.45) | < 0.001a | 2.88 (3.33)/5.00 (4.05) | 0.040a |

|  |
| --- |

aThe P-value was obtained using a paired *t*-test.

**Table S2** Regions with changes in FC during follow-up

| **Seed area** | **MNI coordinates** | **Peak intensity** | **Voxels** | **cohen's f2** |
| --- | --- | --- | --- | --- |
| AMFG_R_7_4 | 15 -36 78 | -5.351 | 30 | 0.75 |
| AMFG_L_7_7 | -48 -45 0 | -5.56821 | 122 | 0.82 |
| 45 24 -6 | -5.34489 | 74 | 0.75 |
| 0 33 39 | -4.42125 | 49 | 0.51 |
| 57 -54 3 | -4.5781 | 44 | 0.55 |
| -57 18 24 | -5.50001 | 32 | 0.796 |
| -39 -27 63 | -6.50001 | 29 | 1.11 |
| AMFG_R_7_7 | -18 -90 30 | -7.50001 | 29 | 1.48 |
| AIFG_L_6_1 | 42 -84 3 | -8.50001 | 49 | 1.9 |
| AIFG_R_6_3 | 24 -93 21 | -9.50001 | 63 | 2.38 |
| -24 -93 18 | -4.61371 | 36 | 0.56 |
| AOrG_R_6_6 | -27 60 -3 | -5.03447 | 87 | 0.67 |
| AMTG_R_4_3 | -36 60 -12 | -6.26413 | 112 | 1.03 |
| AMTG_L_4_4 | 57 -3 9 | 4.85708 | 34 | 0.62 |
| APhG_R_6_4_6_4 | -6 -96 0 | 4.71887 | 27 | 0.59 |
| ASPL_L_5_2 | 42 -18 -27 | -4.38098 | 31 | 0.51 |
| AIPL_L_6_4 | 36 -90 18 | -4.39855 | 32 | 0.51 |
| AINS_L_6_2 | -45 39 -3 | -4.75519 | 42 | 0.59 |
| ACG_R_7_3 | -27 60 -9 | -4.86471 | 48 | 0.62 |
| AMVOcC _L_5_1 | 15 -90 -15 | 4.41434 | 49 | 0.51 |
| AMVOcC _L_5_2 | 18 66 -6 | -4.90326 | 49 | 0.63 |
| AMVOcC _R_5_4 | -114 | 4.44867 | 28 | 0.52 |
| -108 | 4.33324 | 33 | 0.49 |
| ALOcC_L_4_1 | 45 51 -6 | -5.27516 | 31 | 0.73 |
| ALOcC _L_2_1 | 18 66 -6 | -4.66622 | 76 | 0.55 |
| AHipp_L_2_1 | -33 -75 48 | -4.55864 | 27 | 0.55 |
| ABG_L_6_2 | 45 12 -42 | 5.15388 | 25 | 0.7 |
| ABG_R_6_5 | 30 21 -18 | -4.44007 | 39 | 0.52 |
| ATha_R_8_6 | 60 9 21 | -4.58887 | 35 | 0.55 |
| 45 36 6 | -4.56086 | 28 | 0.55 |

A: All results were subjected to GRF correction (voxel *p* = 0.001, cluster *p* = 0.05, two-tailed).

**Table S3** Relationships between changes in FC and GAD scores at the 2-month follow-up

| **Seed area** | **Clusters** | **Peak MNI coordinates** | **Peak intensity** | **Number of voxels** |
| --- | --- | --- | --- | --- |
| BIFG_L_6_1 | CG_R_7_6 | 6 -36 48 | -0.6182 | 131 |
| INS_R_6_3 | 39 24 0 | -0.6263 | 61 |
| ASPL_L_5_2 | IPL_R_6_1 | 54 -63 9 | -0.6121 | 36 |
| LOcC_L_4_4 | -27 -96 -12 | -0.6927 | 34 |
| AMVOcC _L_5_1 | IFG_R_6_5 | 36 15 6 | 0.6727 | 30 |
| AMVOcC _R_5_4 | LOcC_L_4_1 | -42 -87 3 | 0.6271 | 31 |
| BLOcC_L_4_1 | MVOcC _R_5_2 | 6 -81 21 | 0.5604 | 184 |
| BLOcC _L_2_1 | MVOcC _R_5_5 | 9 -78 33 | 0.5288 | 84 |
| PCun_R_4_4 | 9 -54 45 | -0.6111 | 57 |
| IPL_R_6_2 | 45 -75 42 | 0.6181 | 55 |
| ABG_R_6_5 | OrG_R_6_5 | 3 18 -21 | -0.6969 | 48 |

A: All the results were corrected by GRF (voxel *p* value = 0.001, cluster *p* value = 0.05, two-tailed).

B: All results were subjected to GRF correction (voxel *p* = 0.005, cluster *p* = 0.05, two-tailed).

**Table S4** Relationships between changes in FC and PHQ scores at the 2-month follow-up

| **Seed area** | **Clusters** | **Peak MNI coordinate** | **Peak intensity** | **Number of voxels** |
| --- | --- | --- | --- | --- |
| BMVOcC _L_5_1 | IFG_R_6_5 | 36 15 9 | -0.625749 | 29 |
| AMFG_R_7_4 | SFG_L_7_7 | -3 45 18 | -0.6969 | 53 |
| PCun_R_4_3 | 9 -78 42 | -0.6782 | 52 |
| AMTG_L_4_4 | ITG_L_7_4 | -54 -15 -27 | 0.5402 | 70 |
| ITG_R_7_4 | 51 -9 -33 | 0.5507 | 67 |
| BLOcC _L_2_1 | SFG_R_7_1 | 3 27 54 | -0.5879 | 90 |

A: All the results were corrected by GRF (voxel *p* value = 0.001, cluster *p* value = 0.05, two-tailed).

B: All results were subjected to GRF correction (voxel *p* = 0.005, cluster *p* = 0.05, two-tailed).

**Table S5**

The FC between L-Hipp and R-IFG in group SP and NSP at 2 time points  in terms of mean (standard error）.

| **Group** | **number** | **COVID Post-** | **Follow-up** | **F** | **p** |
| --- | --- | --- | --- | --- | --- |
| **COVID SP** | 39 | 0.6(0.011)β | 0.013(0.013)α | 7.444 | 0.008 |
| **COVID NSP** | 19 | -0.1(0.015) | 0.042(0.019)α | 4.427 | 0.04 |
| **F** |  | 14.214 | 1.559 |  |  |
| **P** |  | <0.001 | 0.217 |  |  |

Compared with COVID Post-, α p < 0.05; compared with COVID NSP, β

p < 0.05.

**Table S6**

The FC between R-PrG and R-PrG in group SP and NSP at 2 time points  in terms of mean (standard error）.

| **Group** | **number** | **COVID Post-** | **Follow-up** | **F** | **p** |
| --- | --- | --- | --- | --- | --- |
| **COVID SP** | 39 | 0.107(0.018) β | 0.106(0.022) α | <0.001 | 0.99 |
| **COVID NSP** | 19 | 0.013(0.025) | 0.113(0.031) | 7.542 | 0.008 |
| **F** |  | 9.103 | 0.03 |  |  |
| **P** |  | 0.004 | 0.864 |  |  |

Compared with COVID Post-, α p < 0.05; compared with COVID NSP, β

p < 0.05.

**Table S7**

The FC between R-PrG and L-LoCC in group SP and NSP at 2 time points  in terms of mean (standard error）.

| **Group** | **number** | **COVID Post-** | **Follow-up** | **F** | **p** |
| --- | --- | --- | --- | --- | --- |
| **COVID SP** | 39 | 0.094(0.057) | 0.016(0.014) α | 4.61 | 0.036 |
| **COVID NSP** | 19 | 0.081(0.022) | 0.073(0.020) | 1.31 | 0.719 |
| **F** |  | 0.205 | 0.4 |  |  |
| **P** |  | 0.652 | 0.53 |  |  |

Compared with COVID Post-, α p < 0.05; compared with COVID NSP, β

p < 0.05.

**Table S8**

The FC between L-IPL and R-SFG in group SP and NSP at 2 time points  in terms of mean (standard error）.

| **Group** | **number** | **COVID Post-** | **Follow-up** | **F** | **p** |
| --- | --- | --- | --- | --- | --- |
| **COVID SP** | 39 | 0.081(0.013) β | 0.045(0.014) | 3.569 | 0.064 |
| **COVID NSP** | 19 | -0.022(0.019) | 0.027(0.021) | 3.173 | 0.08 |
| **F** |  | 20.339 | 0.507 |  |  |
| **P** |  | <0.001 | 0.479 |  |  |

Compared with COVID Post-, α p < 0.05; compared with COVID NSP, β

p < 0.05.


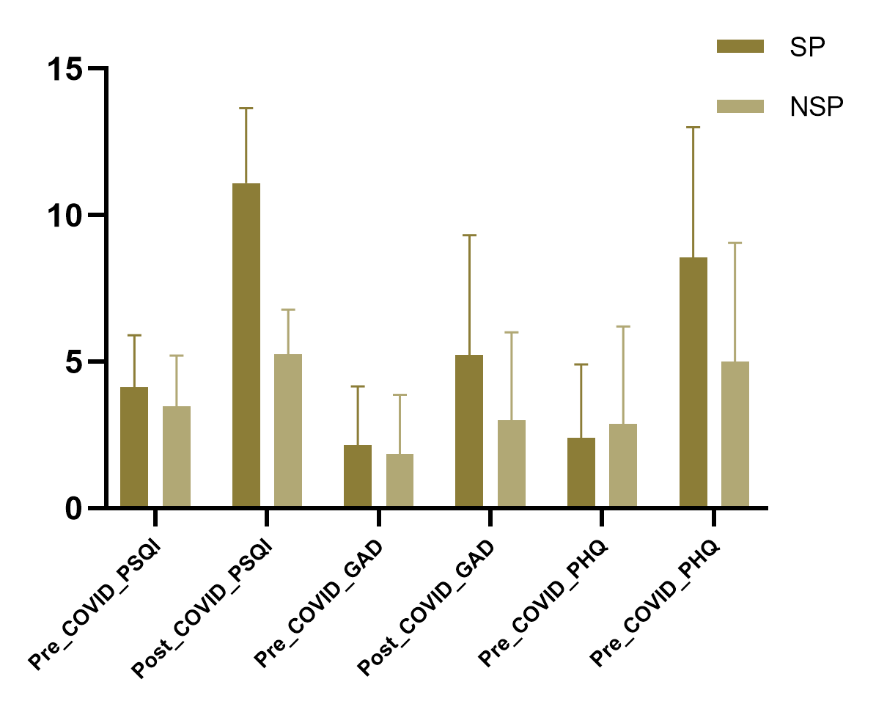


**Figure S1** Self-comparison of scale scores in both groups before and after COVID-19


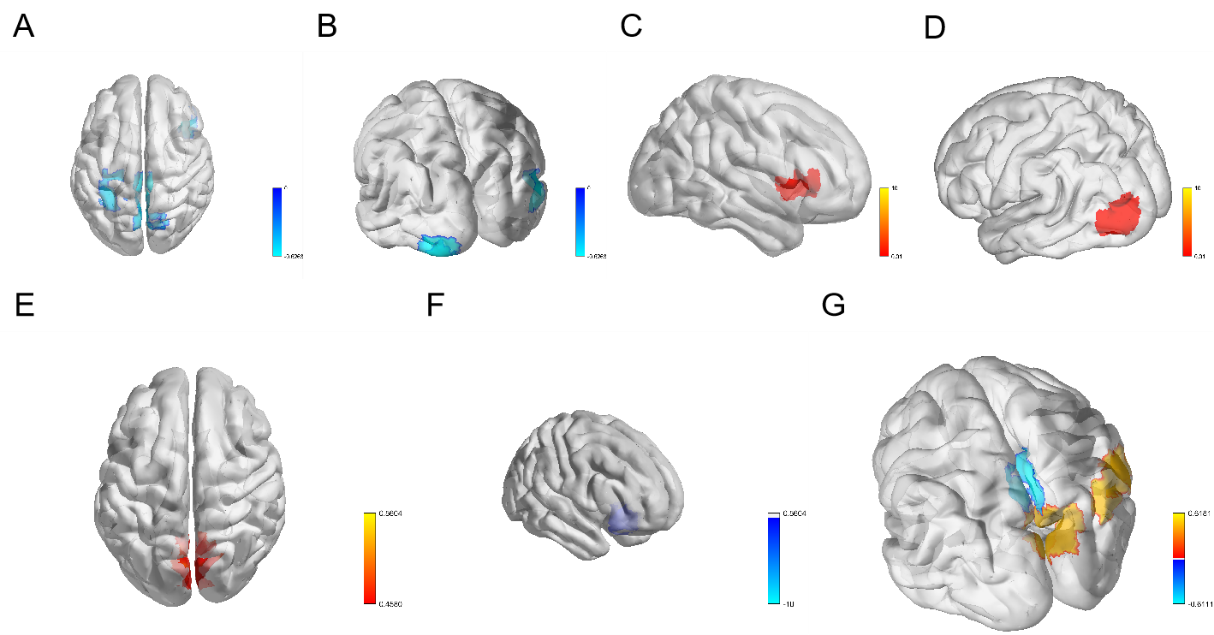


**Figure S2** Relationship between changes in GAD scale scores and brain FC. A. Changes in GAD scores were negatively correlated with changes in FC between the left IFG and right CG/right insula. B. Changes in GAD scores were negatively correlated with changes in FC between the left SPL and right IPL/left LOcC. C. Changes in GAD scores were positively correlated with changes in FC between the left MVOcC and right IFG. D. Changes in GAD scores were positively correlated with changes in FC between the right and left LOcC. E. Changes in GAD scores were positively correlated with changes in FC between the left LOcC and right MVOcC. F. Changes in GAD scores were positively correlated with changes in FC between the right BG and right OrG. G. Changes in GAD scores were positively correlated with changes in FC between the left LOcC and right MVOcC/right IPL and negatively correlated with changes in FC between the left LOcC and right precuneus.


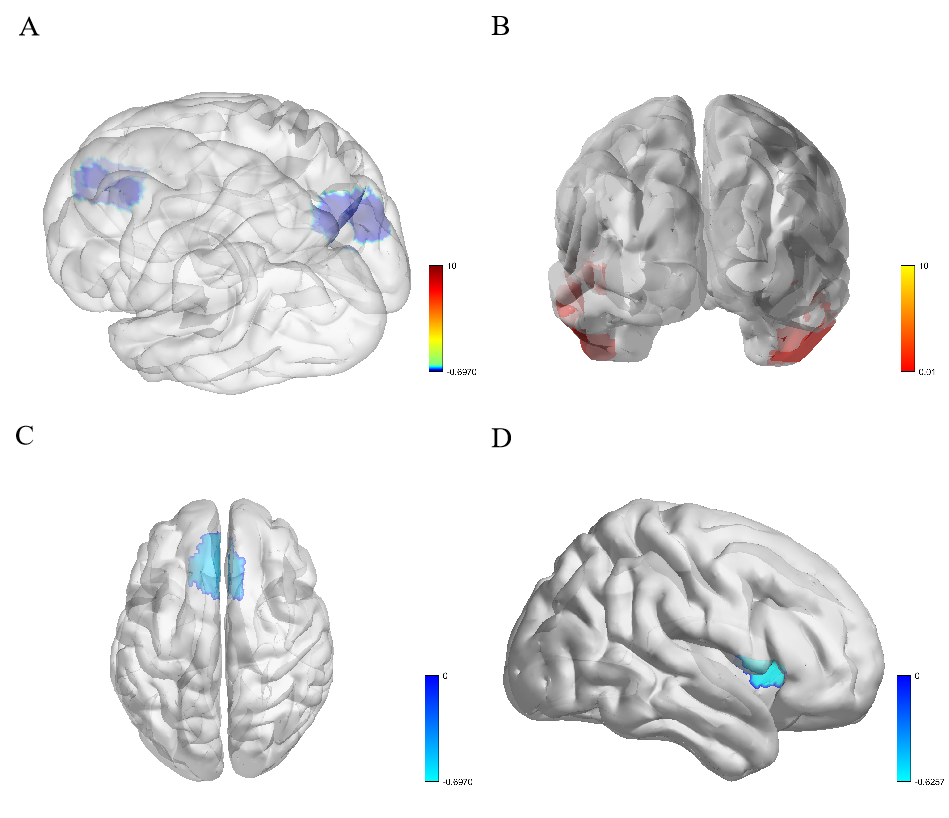


**Figure S3** Relationship between changes in PHQ scores and brain FC. A. Changes in PHQ scores were negatively correlated with changes in FC between the right MFG and left SFG/right precuneus. B. Changes in PHQ scores were positively correlated with changes in FC between the right MTG and bilateral ITG. C. Changes in PHQ scores were negatively associated with changes in FC between the left LOcC and right SFG. D. Changes in PHQ scores were negatively correlated with changes in FC between the left MVOcC and right IFG.
